# Supplementary material for: The self-assembly of benzyl alcohol derived deep-cavity cavitands: a new, highly efficient moiety for irreversible assemblies?
Source: Royal Society of Chemistry journal article supplement (doi:10.1039/a908144e), 2000-01-01
Supplement: a908144e.doc [file a908144e.doc]

**Supplementary data**

**The self-assembly of benzyl alcohol derived deep-cavity cavitands: a new, highly efficient, supramolecular motif for irreversible assemblies?**

**Corinne L.D. Gibb, Edwin D. Stevens and Bruce C. Gibb***

*Department of Chemistry, University of New Orleans, New Orleans, Louisiana 70148*

**Synthesis of Deep-Cavity Cavitands (DCCs) 3, 4, 6 and DCC Dimer 5.**

**General**

All chemicals were reagent grade and used “as is” with the following exceptions: THF was distilled under N2 from sodium benzophenone ketyl. DMF was distilled under reduced pressure and stored over molecular sieves. DMSO was dried with BaO before distillation at reduced pressure and stored over molecular sieves (type 3A). All reactions were carried out under N2.

Flash chromatography (Silica gel 60Å, 200-400 mesh; Natland International) was used for product purification. Unless otherwise noted, NMR spectra were recorded in CDCl3 (using residual CHCl3 as a reference) on either a Varian Gemini or Unity (300, and 400 MHz respectively) spectrometer. MS analysis of the DCCs **4** and **6** utilized a Micromass Quattro II Electrospray while the analysis of DCC **3** and hemi-carcerand **5** utilized a PerSeptive Biosystems Voyager Elite MALDI-TOF instrument. Elemental analysis was performed by Atlantic Microlab Inc. Melting points were measured on a Mel-Temp II apparatus and are uncorrected.

**DCC 3**

To an oven (150 ˚C) dried flask was added 0.3 g (0.19 mmol) of DCC **2** and 30 mL THF. After the stirring solution was cooled to -78 ˚C 15.2 equivalents of *n*-BuLi (2.89 mmol; 1.4 M soln, 2.07 mL) was added over a 7 min. period. After an additional 2 min, 26.8 equivalents of B(OMe)3 (5.11 mmol, 572 µL) was added over a 7 min. period. After a further 5 min. the reaction vessel was removed from the Dewar flask, the reaction allowed to warm up slowly to ambient temperature (1 hour) and then stirred for an additional 30 min at room temperature. The temperature of the reaction was then reduced to -78 ˚C and 4.8 mL of an aqueous solution of H2O2 and NaOH (made by combining a 3.0 M NaOH solution and a 50% aqueous H2O2 with water in a 5:3:2 ratio respectively, i.e., 38.4 equivalents of NaOH and 112 equivalents of H2O2). After stirring for 2 min. the reaction was removed from the Dewar flask, allowed to warm to ambient temperature and stirred at room temperature (3 hours total). After this period, 26.8 equivalents (5.11 mmol, 0.97 g) of Na2S2O5 was carefully added and the mixture stirred for 5 min. The pH was then (if need be) adjusted to neutral, and the organic solvent removed under reduced pressure to leave the crude product as a yellow solid suspended in water. This solid was filtered, washed with water, and then dissolved in ethyl acetate. Drying the organic layer with anhydrous MgSO4 and removing the solvent under reduced pressure gave the crude product as an off white solid. Column chromatography, (dry loaded) with a mobile phase of 1:1 ethyl acetate : hexane eluted traces of the mono, bis, and tris phenoxy derivatives. Increasing the mobile phase polarity to 3:2 ethyl acetate : hexane, gave the required DCC **3** as a colorless solid after removal of the solvent under reduce pressure. The cavitand was dried (0.1 mmHg, 110 ˚C) overnight. Yield 64%. mp 195 ˚C with decomp; 1H NMR (300 MHz, acetone-*d*6)  2.73 (m, 16H), 5.02 (t, 4H, *J* = 3.9 Hz), 5.51 (s, 4H), 6.88 (d, 8H, *J* = 8.4 Hz), 6.91 (s, 4H), 7.25 (m, 20H), 7.59 (d, 8H, *J* = 8.4 Hz), 7.83 (s, 4H), 8.54 (s, 4H); MS *m*/*z* 1321.57 (M + H+). Anal. Calcd for C88H72O12 + 2H2O: C, 77.85%; H, 5.64 %. Found: C, 77.98%; H, 5.48%.

**DCC 6**

To an oven (150 ˚C) dried flask was added 3 g (1.9 mmol) of DCC **2** and 200 mL THF. After the stirring solution was cooled to -78 ˚C, 8 equivalents of *n*-BuLi (15.25 mmol, 1.4 M soln., 10.89 mL) was added dropwise over 20 min. After stirring for 5 min., 20 equivalents of degassed, anhydrous DMF (38.14 mmol, 2.95 mL) in 12 mL of dry THF was added dropwise and the reaction stirred at -78 ˚C for 1 hour. The solution was then allowed to reach 0 ˚C (30 min) and quenched with 10% HCl until acidic. The mixture was then extracted 3 times with CHCl3, the organic layers combined and dried with anhydrous MgSO4, the solvent removed under reduced pressure, and the product purified by column chromatography (100% CHCl3). Removal of the solvent gave a colorless solid which was dried (0.1 mmHg, 110 ˚C) overnight. Yield 70%. mp 328 ˚C with decomp; 1H NMR (400 MHz)  2.64 (m, 16H), 5.02 (t, 4H, *J* = 7.8 Hz), 5.51 (s, 4H), 6.71 (s, 4H), 7.17 (m, 20H), 7.30 (s, 4H), 7.80 (d, 8H, *J* = 8.4 Hz), 7.92 (d, 8H, *J* = 8.4 Hz), 10.00 (s, 4H). MS *m*/*z* 1404.0 (M + Cl–)–. Anal. calcd for C92H72O2: C, 80.68%; H, 5.29%. Found: C 80.39%; H, 5.39%.

**DCC 4**

To a solution of DCC **6** (1 g, 0.73 mmol) in 50 mL THF and 10 mL of methanol, was added 4.4 equivalents of NaBH4  (3.2 mmol, 121 mg). The reaction was stirred at room temperature for 1.5 hours. The solution was then carefully quench with 10% HCl (until acidic) before being extracted 3 times with CHCl3. The organic layers were then combined, dried with anhydrous MgSO4, and the solvent removed under reduced pressure. The product was obtained in 91% yield by crystallization from CHCl3/hexane. mp 219–222 ˚C 1H NMR (400 MHz, acetone–*d*6)  2.76 (m, 16H), 4.30 (t, 4H, *J* = 5.8 Hz), 4.68 (d, 8H, *J* = 5.6 Hz), 5.07 (m, 4H), 5.60 (s, 4H), 6.98 (s, 4H), 7.25 (m, 20H), 7.44 (d, 8H, *J* = 8.4 Hz), 7.74 (d, 8H, *J* = 8.0 Hz), 7.88 (s, 4H); MS *m*/*z* (M+ Cl–)– 1412.6. Anal. Calcd for C92H80O12 + H2O: C, 79.17%; H, 5.92%. Found: C, 79.11%; H, 5.86%.

**DCC Dimer** **5**

50 mg (3.63 x 10-5 mol) of DCC **4** was added to 30 mL of DMSO. To this stirring solution was added 15 equivalents of H2O (5.44 x 10-4 moles, 9.78 L), 10 equivalents of *t*-BuOK (3.63 x 10-4 mol, 40 mg) and 8.4 equivalents of CH2BrCl (0.307 mmol, 20 L), and the reaction was stirred at room temperature for 5 hours. After this time, the solvent was removed under reduced pressure, and the solid partitioned between CHCl3 and water. Washing the water with a further 2 aliquots of CHCl3, combining the organic layers, drying with anhydrous MgSO4, and removing the solvent under reduced pressure gave the crude product as an off-white solid. Column chromatography (CHCl3 mobile phase) afforded the product as a colorless solid. Yield 80% yield. mp >400 ˚C; 1H NMR (400 MHz)  2.70 (m, 32H), 4.71 (s, 16H), 4.76 (s, 8H), 5.07 (t, 8H, *J* = 7.6 Hz), 5.41 (s, 8H), 6.69 (s, 8H), 7.22 (m, 40H), 7.31 (s, 8H), 7.45 (d, 16H, *J* = 7.6 Hz), 7.63 (d, 16H, *J* = 7.6 Hz); MS *m*/*z*: 2826.84 (M + Na+)+. Anal. Calcd. for C188H160O24: C, 80.54%; H, 5.75%. Found: C, 80.29%; H, 5.82%.

**A Semi-quantitative Description of Self-Assembly: The Assembly Number.**

As a measure of the efficiency of these types of self-assembly we define here the term ‘assembly number’ (AN) as the ratio of the isolated yield of a compound over its theoretical yield (derived by assuming 100% efficiency for each of the possible (energetically reasonable) reaction options available to the *isolated* self-assembly components which appear in the product). Take the synthesis of a normal carceplex as an example.

Firstly, the two cavitands and four BrClCH2 molecules are isolated in a ‘box’ (a sign of a good self-assembly system is that we can ignore possible polymerization reactions). After each cavitand reacts with a BrClCH2 molecule (in 100% yield) we have what we can call the A-A’ bridged species (see above). This new molecule has several choices: phenol group B can react with B’, C can react with C’, D can react with D’. After either of these cases, models indicate that there cannot be any miss-matches in the subsequent chemistry; in other words, these options will follow a (quantitative) route to product by reaction with the remaining BrClCH2. In the situations where B react with D’ or D can react with B’ these options will lead to non-product. Because of the rigidity of the molecule, there are no other reaction options (e.g., B cannot reach C’). Thus, three out of five reaction options will go on to form the carceplex; a statistical yield of 60%. Since the optimal carceplex yield is 87%, (Chapman, R. G.; Chopra, N.; Cochien, E. D.; Sherman, J. C. *J. Am. Chem. Soc.* **1994**, *116*, 369-370) we therefore assign an assembly number of 1.45.

In the case of the assembly of extended cavitands reported by Cram (von dem Bussche-Hünnefeld, C.; Bühring, D.; Knobler, C. B.; Cram, D. J. *Chem. Commun.* **1995**, 1085-1087), as well as the deep-cavity cavitands described here, the situation is a little more complex. Thus, these molecules are sufficiently flexible that after the first step (mono-bridged species A-A’), phenol group B is capable of reacting with B’, C’ or D’. Similarly, after a successful second bridge (adjacent to the first), the molecules’ reduced rigidity still allows potential mistakes where for example, C reacts with D’ instead of C’. It should be noted that this latter route to non-product is not available if the second bridge is opposite to the first, i.e., the molecule is the bis-bridged A-A’, C-C’ species. The added flexibility of these systems reduces the statistical yield to 19.8%. Thus assembly numbers for Cram’s analogous hemi-carcerand and molecule **5** are 1.62 and 4.04 respectively.

These derivations provides a semi-quantitative guide to these (and other?) self-assemblies: AN < 1 not an assembly process (sub-quantitative); AN = 1, any quantitative reaction; AN > 1 (the higher the better), an assembly process (supra-quantitative).

CHCl3/DMSO solution.
